# Supplementary material for: Atomic structure and defect dynamics of monolayer lead iodide nanodisks with epitaxial alignment on graphene
Source: PubMed Central journal article supplement (PMC7010709; doi:10.1038/s41467-020-14481-z), 2020-02-10
Supplement: 41467_2020_14481_MOESM1_ESM.pdf [file 41467_2020_14481_MOESM1_ESM.pdf]

1 Atomic Structure and Defect Dynamics of Monolayer  
2 Lead Iodide Nanodisks with Epitaxial Alignment on  
3 Graphene

4 *Sapna Sinha<sup>1</sup>, Taishan Zhu<sup>2</sup>, Arthur France-Lanord<sup>2</sup>, Yewen Sheng<sup>1</sup>, Jeffrey C. Grossman<sup>2</sup>,*  
5 *Kyriakos Porfyrakis<sup>1</sup>, Jamie H. Warner<sup>1\*</sup>*

6 <sup>1</sup>Department of Materials, University of Oxford, 16 Parks Road, Oxford, OX1 3PH, United  
7 Kingdom

8 <sup>2</sup>Department of Materials Science and Engineering, Massachusetts Institute of Technology,  
9 77 Massachusetts Avenue, Cambridge, MA 02139, USA

10 Email: \*[jamie.warner@materials.ox.ac.uk](mailto:jamie.warner@materials.ox.ac.uk);

11

12

## Supporting Information

### 13 **Supplementary Note 1. Sonication duration and stability of dispersed solution**

14 We observed that sonication time is important for the exfoliation of  $\text{PbI}_2$ . Less sonication  
15 leaves multilayer  $\text{PbI}_2$  dispersed in the solution whereas longer sonication time renders very  
16 small flakes or completely destroys the sheets. Moreover, the dispersed solution was found to  
17 be stable for even after a week of the sonication process.

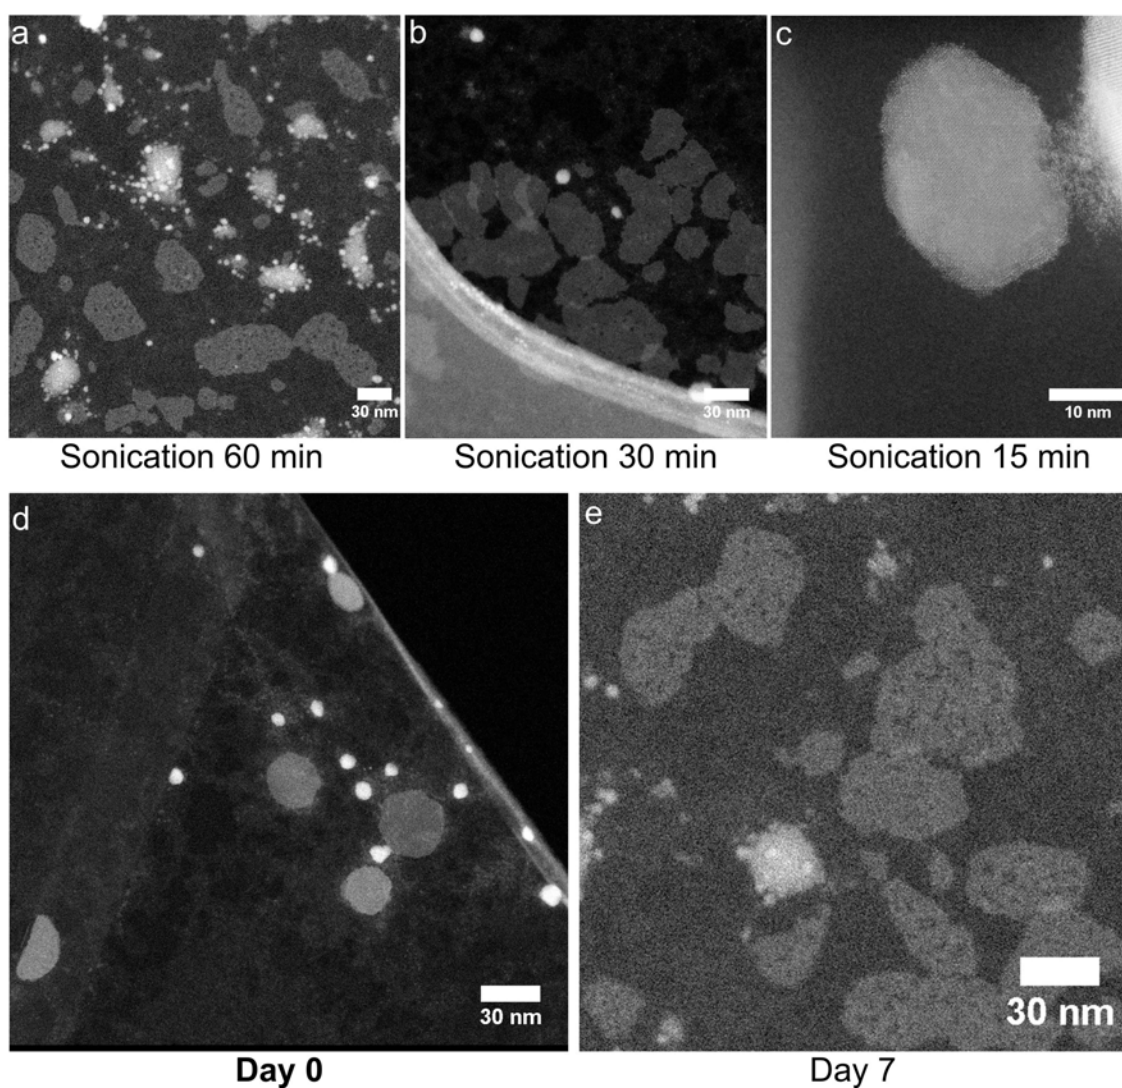

18

19 **Supplementary Figure 1.** ADF-STEM image of  $\text{PbI}_2$  suspended on graphene. The  
20 exfoliation was carried out via sonication after (a) 60 minutes (b) 30 minutes (c) 15 minutes.

21 ADF-STEM images of 30-minute sonicated samples on (d) day 0 (a) day 7. Small high  
22 contrast nanoparticles are residue from the graphene support and are not from the  $\text{PbI}_2$  sample

23

24

25 **Supplementary Note 2. Solution used for dropcasting**

26 We have used the top of the supernatant from the dispersed solution to prepare the TEM  
27 samples. The thicker  $\text{PbI}_2$  settled at the bottom of the container, as shown in supplementary  
28 figure 2(a). The thickness of  $\text{PbI}_2$  at the bottom and top is not the same. The flakes at the  
29 bottom were comparative to the thickness of the flakes that were found at the top of an  
30 inadequately sonicated solution (as discussed in Supplementary Note 1).

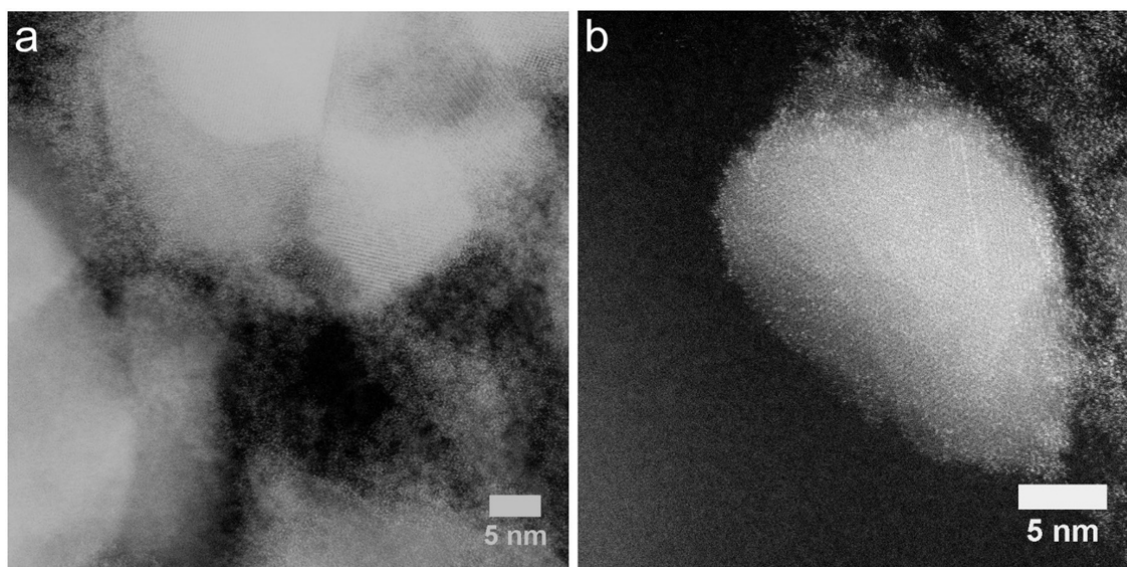

32 **Supplementary Figure 2.** ADF-STEM image of  $\text{PbI}_2$  suspended on graphene. The  
33 exfoliation was carried out via sonication after (a) 30 minutes and the solution was taken  
34 from the bottom of the container. (b) 15 minutes and the solution was taken from the top of  
35 the container.

36

37

38

39

40 **Supplementary Note 3. One of the two bilayer  $\text{PbI}_2$  found in the experiment.**

41 Supplementary figure 3 shows ADF-STEM images of two flakes of  $\text{PbI}_2$  suspended on  
42 graphene. Supplementary figure 3(b-c) are the magnified images of the monolayer flake in  
43 supplementary figure 3(a) in the blue box. Supplementary figure 3(d-e) are the magnified  
44 images of the bilayer flake in supplementary figure 3 (a), in the red box. The intensity  
45 difference in ADF-STEM images of the monolayer and bilayer regions can be seen clearly in  
46 supplementary figure 3 (a). Supplementary figure 3(f) shows the line profile of the bilayer  
47 flake at one of the edges which has some monolayer region. The intensity of the bilayer  
48 region, as expected, is twice as high as that of the monolayer region.

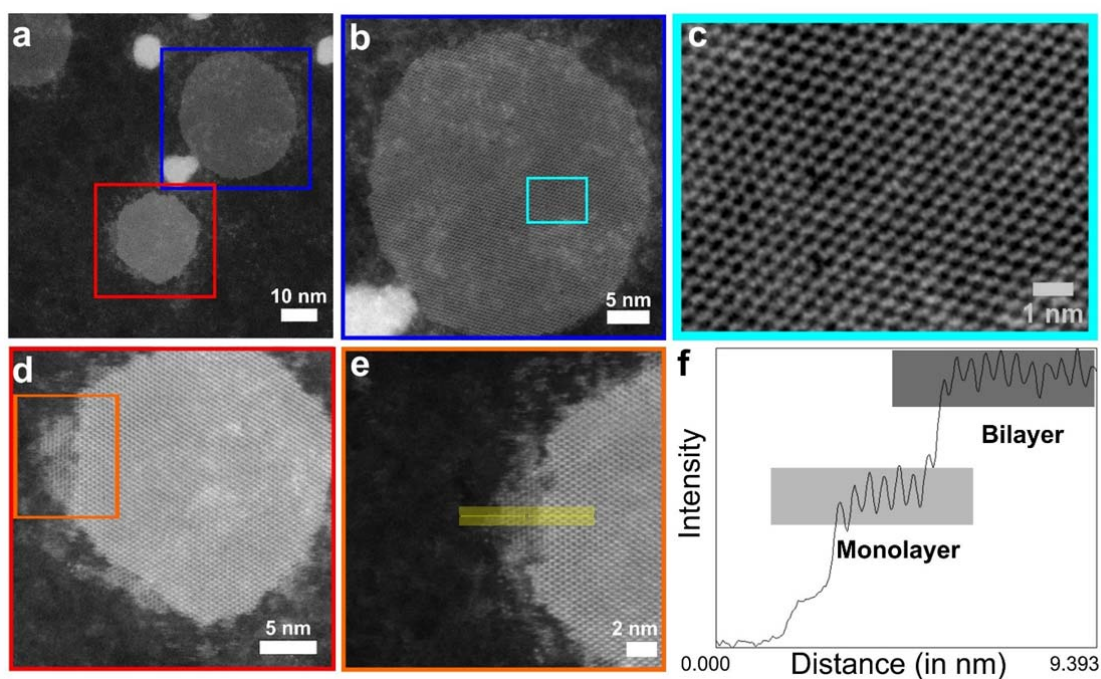

49

50 **Supplementary Figure 3.** (a) Low-magnification ADF-STEM image of monolayer and  
51 bilayer regions. (b) High magnification image of monolayer region marked in blue box in  
52 panel (a). (c) Higher magnification image of monolayer region marked in cyan colored box in  
53 panel (b). (d) High magnification image of bilayer region marked in red box panel (a). (e)  
54 Higher magnification image of monolayer and bilayer region in the flake marked in orange  
55 colored box in panel (d). (f) Line profile of the region marked with yellow color in panel (e)  
56 showing the increase in intensity, confirming the presence of bilayer.

57

58 **Supplementary Note 4. Nanoparticle residues from graphene sample preparation**

59

60 The small high contrast nanoparticles come from graphene sample and are not from the  $\text{PbI}_2$ .

61 supplementary figure4 below shows the graphene samples without any dropcasted  $\text{PbI}_2$ ,

62 suspended on the lacey carbon TEM grid.

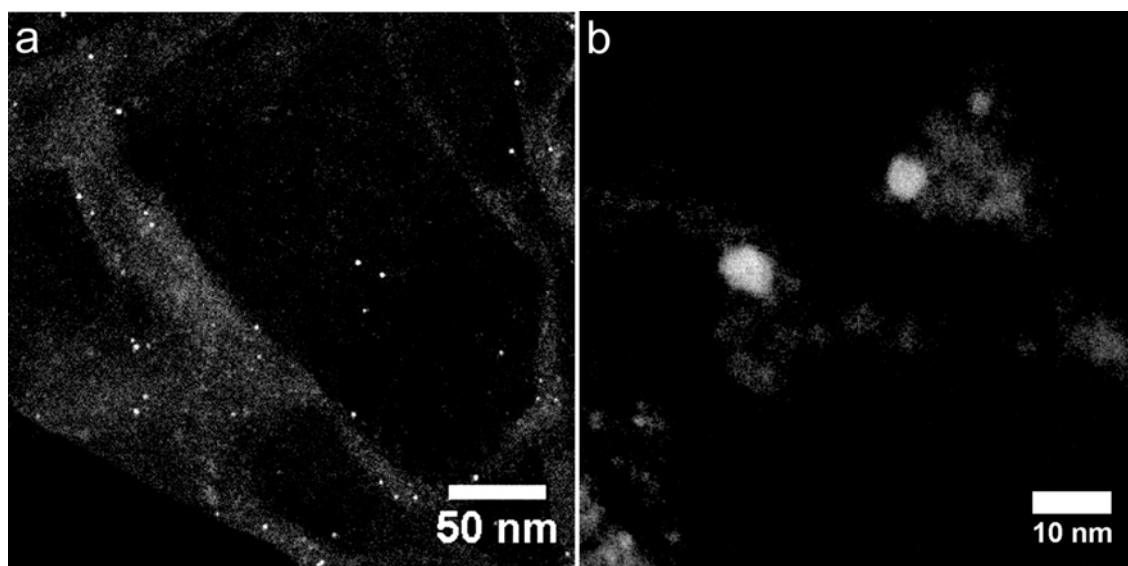

63

64 **Supplementary Figure 4.** (a) Low magnification and (b) High resolution ADF-STEM  
65 images of residue nanoparticles on graphene.

66

67 **Supplementary Note 5. Evidence of monolayer regions instead of bilayer AA' stacked**  
68 **bilayer PbI<sub>2</sub>.**

69 Supplementary figure 5 shows one of the typical flakes of PbI<sub>2</sub> produced by liquid exfoliation.  
70 At t=0, the monolayer is as shown in supplementary figure 5(a). However, upon extended  
71 exposure from the electron beam, after 2 minutes, there is hole opening up as well as edges  
72 damaged. The hole opening can be clearly seen in supplementary figure 5(b), highlighted  
73 with red arrow. This indicates that the area in supplementary figure 5(a) is indeed a  
74 monolayer instead of AA' stacked 1H structural phase of lead iodide that looks identical to  
75 the monolayer 1H lead iodide. The images are taken at room temperature.

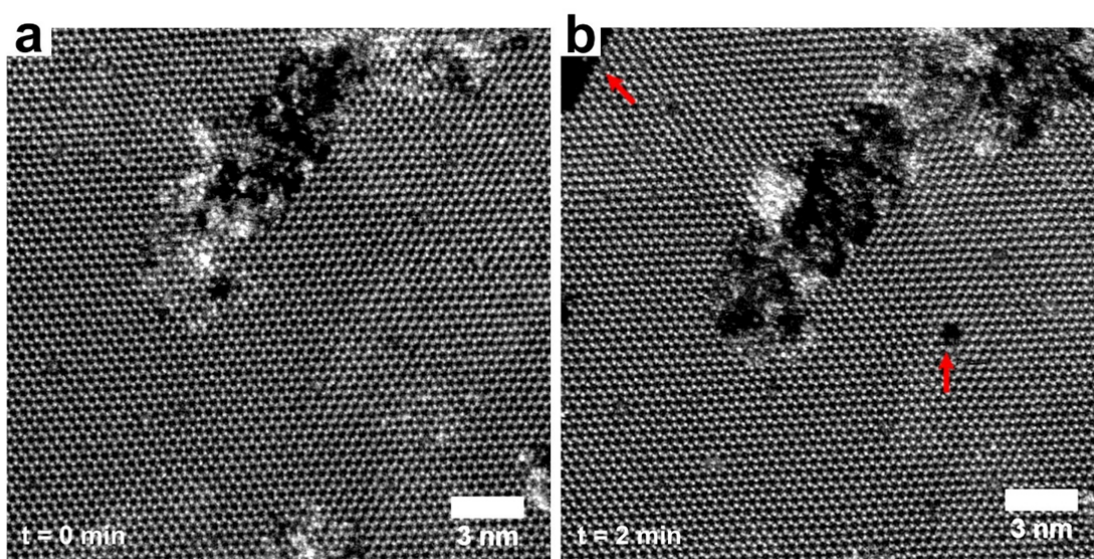

76

77 **Supplementary Figure 5.** (a) ADF STEM image of monolayer lead iodide region at t=0. (c)  
78 At t=2min, hole opening up in the monolayer region of supplementary figure a. The red  
79 arrows indicate the regions where the defects form.

80

81



82 **Supplementary Note 6. All sizes of nanodisks show the 1H structure.**

83 All  $\text{PbI}_2$  flakes suspended on graphene, from smallest 3nm to larger hundreds of nanometers  
84 in size (supplementary figure 6), showed 1H phase, attributed to epitaxial interactions with  
85 the underlying graphene support. The following supplementary figure 6 shows (a) large flake  
86 (b) very small flake. The ADF-STEM images here are taken at 60kV.

87

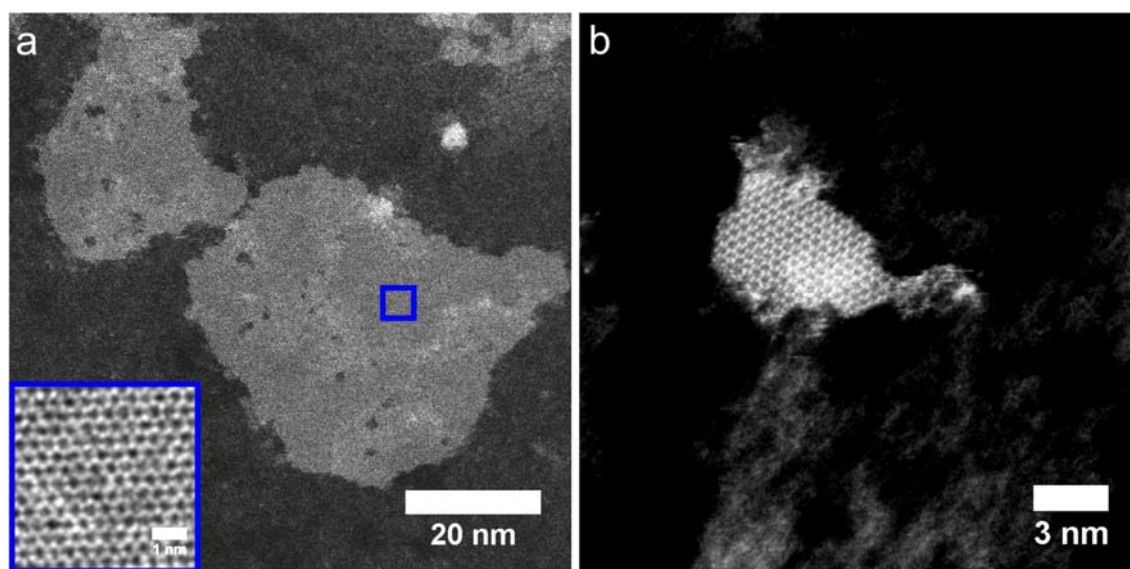

89 **Supplementary Figure 6.** ADF-STEM image taken at 60kV of (a) large (b) small  $\text{PbI}_2$   
90 suspended on graphene.

91

92



93 **Supplementary Note 7. Orientation and lattice direction of PbI<sub>2</sub>**

94 Graphene lattice plays a role in influencing the orientation of PbI<sub>2</sub> lattice after it has been  
95 drop-casted on top. The CVD grown graphene is known to have grain boundaries and random  
96 orientation on the substrate on which it is grown. Hence, different regions of interest showed  
97 different PbI<sub>2</sub> orientation but all the PbI<sub>2</sub> crystals in one particular area had the same  
98 orientation. supplementary figure 7 shows two different regions on the same sample. Both of  
99 them had different orientations because of different graphene domains. However, the flakes  
100 in the same region had the same lattice orientation (supplementary figure 7 (a-c);  
101 supplementary figure 7 (d-f).

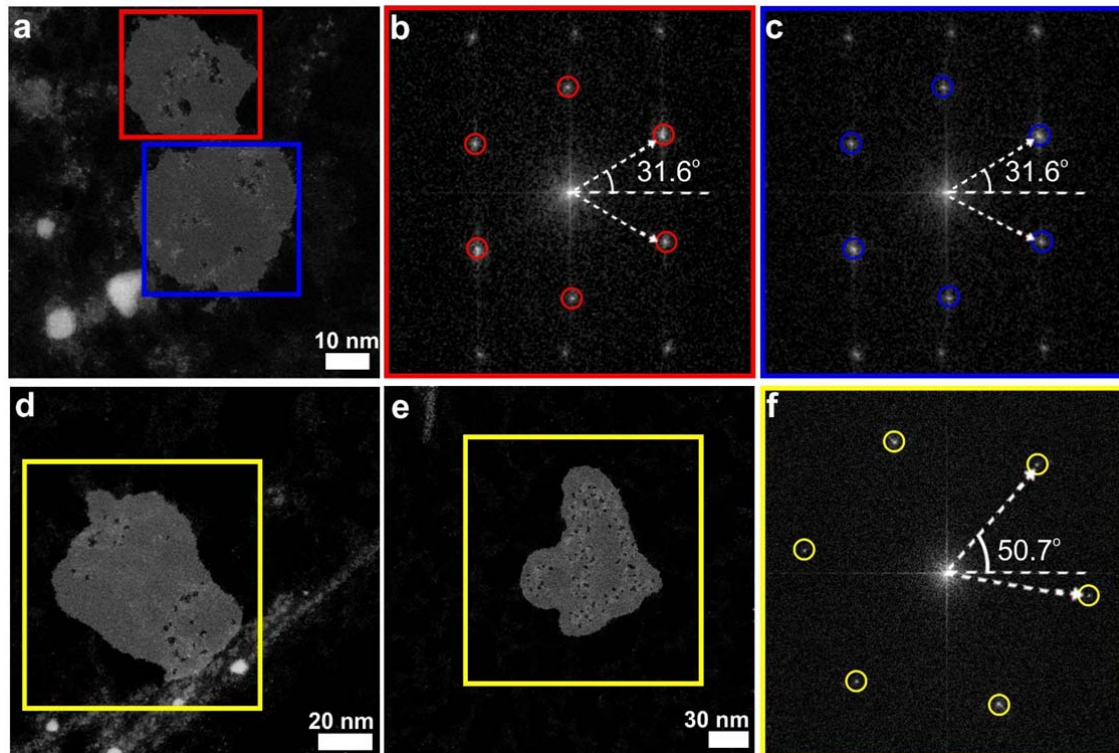

102  
103 **Supplementary Figure 7.** (a) ADF-STEM images of two PbI<sub>2</sub> flakes in the same area of  
104 interest. (b) FFT of the flake in the red boxed region in supplementary figure a. (c) FFT of the  
105 flake in the blue boxed region in supplementary figure a. (d-e) ADF-STEM images of two  
106 monolayer crystals of PbI<sub>2</sub> in the same region of interest, close to each other (< 200 nm). (f)  
107 FFT of the flakes in the yellow boxed regions of supplementary figure d and e showed the  
108 same orientation and pattern.

109  
110  
111

112 **Supplementary Note 8. Orientation and lattice direction of PbI<sub>2</sub>**

113 Further examples of PbI<sub>2</sub> showing the same lattice orientation on top of graphene. All the  
114 nanodisks were imaged from the same region of the TEM grids, and hence, all of them orient  
115 with similar direction, as it can be seen by their FFT.

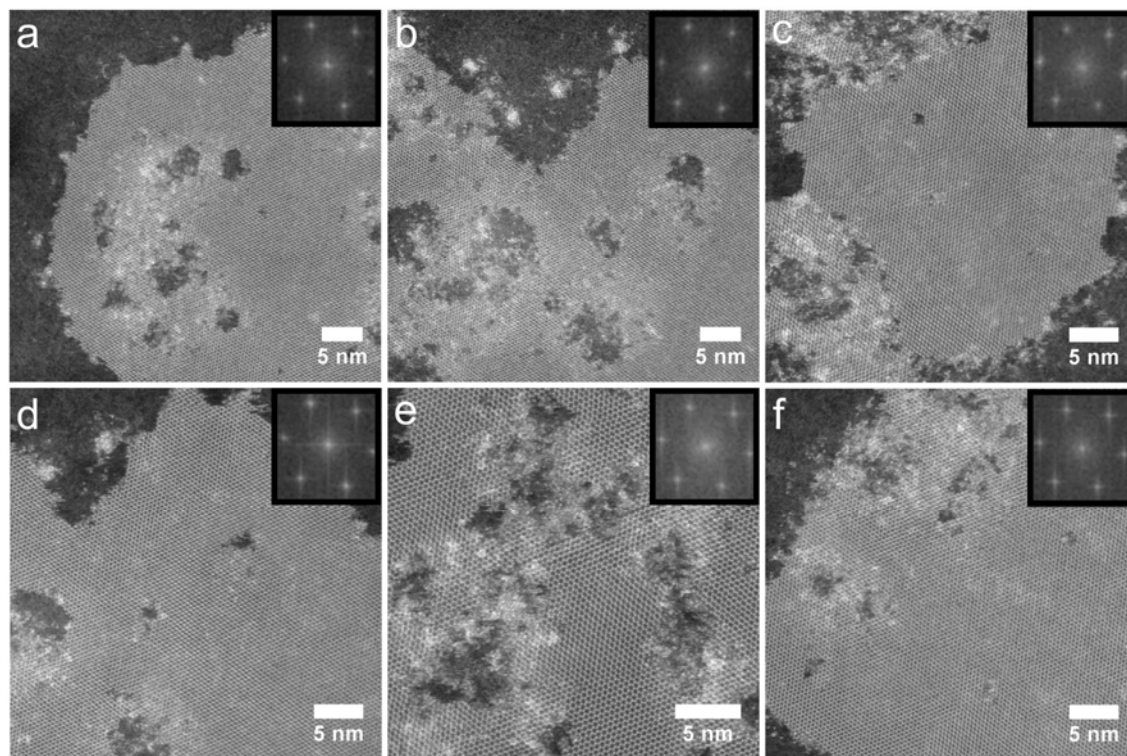

116

117 **Supplementary Figure 8.** (a-f) ADF-STEM images of PbI<sub>2</sub> flakes in the same area of  
118 interest. The insets show the FFT of the flake. All the FFTs showed the same orientation and  
119 pattern.

120

121 **Supplementary Note 9. T-phase of lead iodide on lacey carbon grid**

122  $\text{PbI}_2$  flakes on top of lacey carbon grid showed 1T structural phase, an example of which has  
123 been shown in the supplementary figure 9. The intensity and the structure of the monolayer  
124 flakes are not as good as that of the flakes suspended on graphene because graphene is a very  
125 clean substrate whereas lacey carbon has impurities on top. Intensity of the lead and iodide  
126 atoms as well as the inter-column spacing between Pb-Pb, as shown in supplementary figure  
127 9(d) agrees with that of the simulation of 1T phase, discussed in the main text and shown in  
128 main text figure 2.

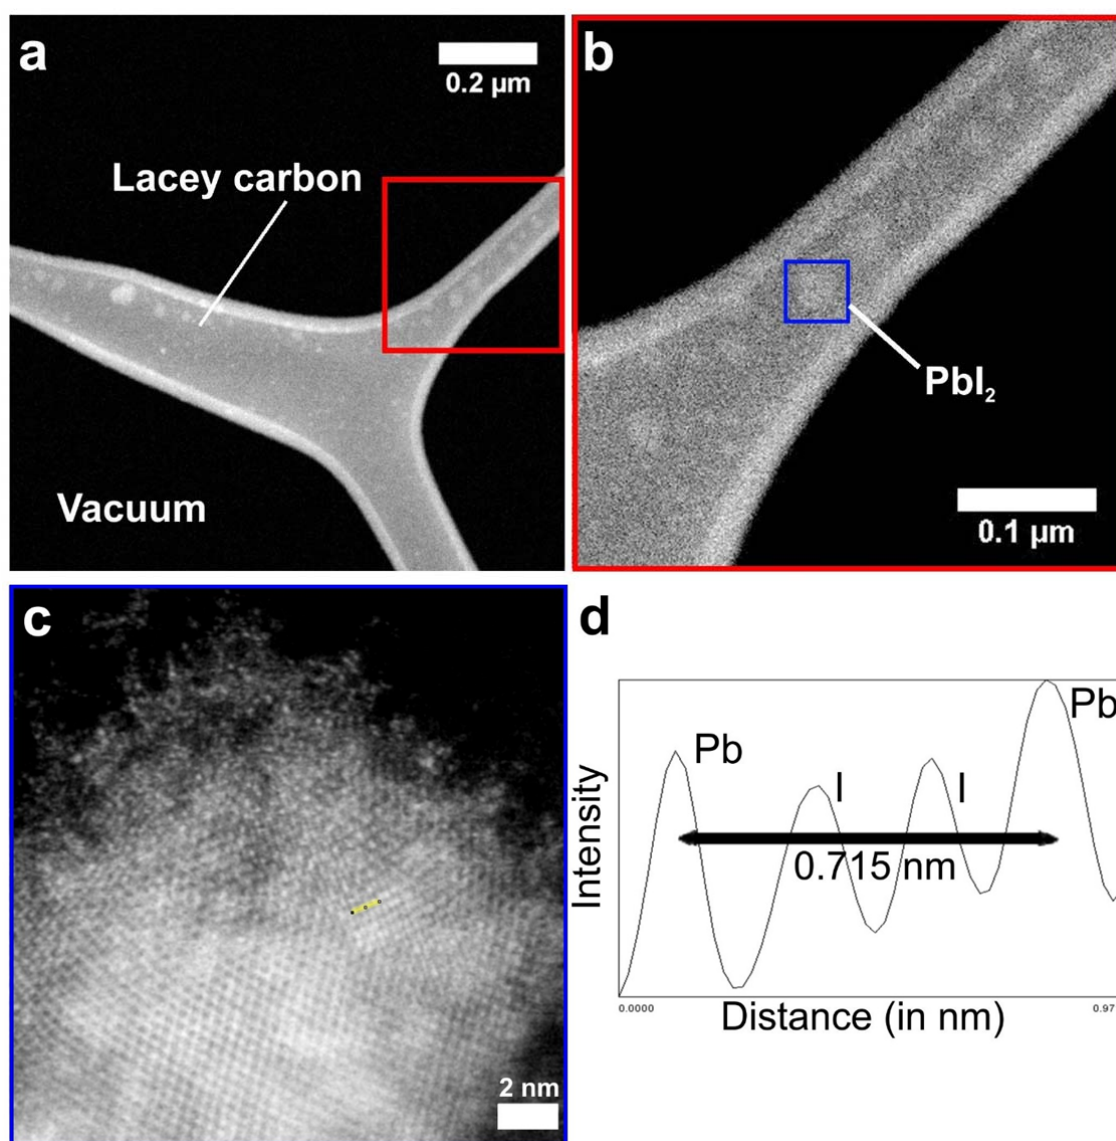

130 **Supplementary Figure 9.** (a) Low magnification ADF-STEM image of  $\text{PbI}_2$  flakes deposited  
131 on top of lacey carbon via the liquid phase exfoliation method. The small white contrasts on  
132 the lacey carbon are the  $\text{PbI}_2$  flakes. (b) Higher magnification of the region drawn with a red  
133 box in (a). (c) Higher magnification of the monolayer region drawn with a blue box in (b). (d)  
134 Line profile of the region marked with yellow in (c).

135

136

137 **Supplementary Note 10. Transformation of lead iodide flake into 1H structure just after**  
138 **deposition.**

139 ADF-STEM imaging of  $\text{PbI}_2$  flakes within 20 minutes after being dropcasted on graphene.  
140 We observed mechanical shift in the structure while it transforming into 1H phase.  
141 Supplementary figure 10 (a) shows the mixed structural phases in  $\text{PbI}_2$  right after dropcasting.  
142 The structures other than 1H have been indicated with the X sign. supplementary figure 10  
143 (c) is the high resolution image of the area boxed in red color in supplementary figure 10 (a).  
144 An example of line profile from one of the X structural regions is shown in supplementary  
145 figure 10 (e). The interatomic distance is very different to that observed for 1T or 1H phases  
146 and also differs in different regions, indicating that the material is going some  
147 transformations. And after a day, we observed that all the flakes on graphene showed 1H  
148 structural phase with same orientations in a given area. Supplementary figure 10 (b) shows  
149 the uniform 1H structural phase in  $\text{PbI}_2$  after a day. Supplementary figure 10 (d) is the high  
150 resolution image of such flake. An example of line profile from any region is shown in  
151 supplementary figure 10 (f). The interatomic distance confirms that it is indeed the 1H phase.



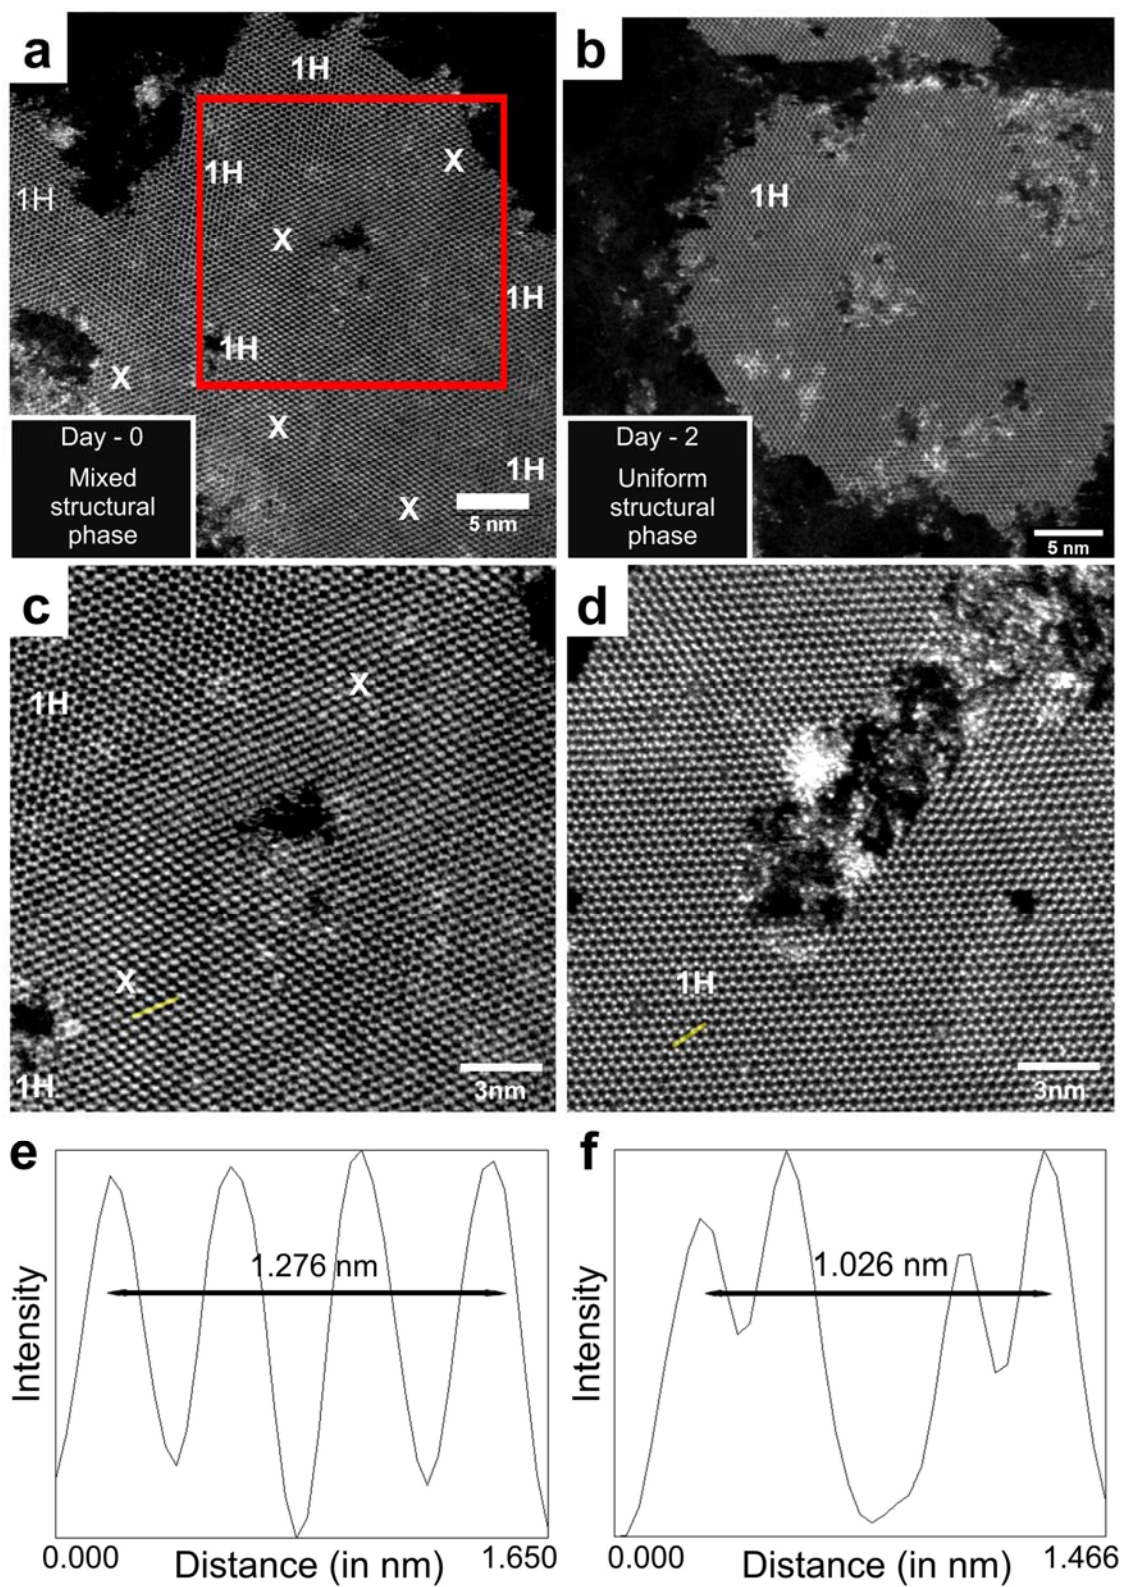

152

153 **Supplementary Figure 10.** (a) ADF-STEM image of mixed structural phases in PbI<sub>2</sub> right  
 154 after dropcasting. The local regions with stacking other than 1H have been indicated with the  
 155 X sign. (b) shows the uniform 1H structural phase in PbI<sub>2</sub> after a day. (c) High resolution

156 image of the area boxed in red color in panel a. (d) High resolution image of uniform 1H  
157 structural phase. (e) Line profile from one of the X structural regions is shown in yellow  
158 annotation in panel c. (f) Line profile from yellow annotated region in panel d confirming that  
159 it is indeed the 1H phase.

160



161 **Supplementary Note 11. Moire patterns of 1T and 1H on graphene**

162 To understand why  $\text{PbI}_2$  adopts 1H structure with concomitant alignment to the armchair  
163 direction of graphene, we examine the Moire patterns formed between the two crystals in  
164 supplementary figure 11 (a-d). The different lattice spacings of 1T and 1H  $\text{PbI}_2$ , result in  
165 various degrees of commensuration with the underlying graphene lattice. The smaller the  
166 difference in the relative lattice spacings between the two crystals, the larger the van der  
167 Waals interaction is likely to be. The best lattice match occurs when the  $\text{PbI}_2$  adopts 1H phase  
168 and is aligned to the arm-chair direction, which agrees with our experimental findings

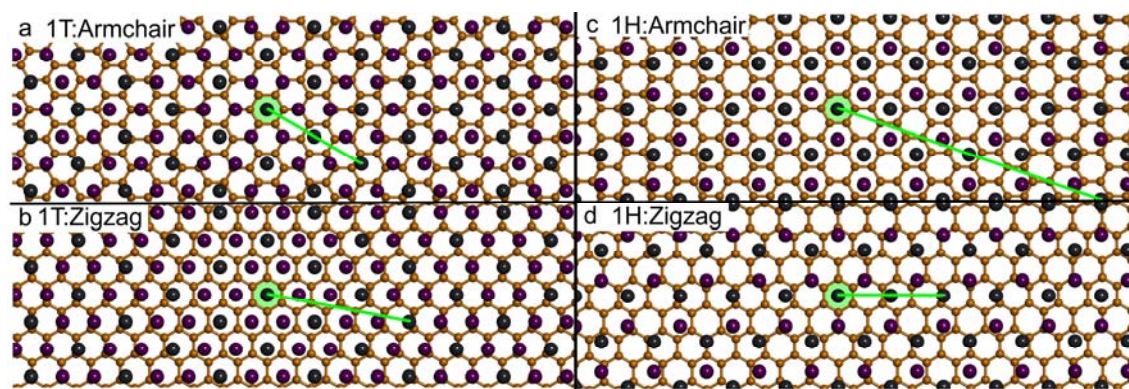

169 **Supplementary Figure 11.** Atomic images of (a)  $\text{PbI}_2$  (1T) aligned to graphene armchair, (b)  $\text{PbI}_2$  (1T)  
170 aligned to graphene zigzag, (c)  $\text{PbI}_2$  (1H) aligned to graphene armchair, (d)  $\text{PbI}_2$  (1H) aligned to graphene  
171 zigzag. Green shading indicates the position of Pb located in center of graphene hexagon. Green line indicates  
172 the minimum distance where Pb atom overlaps a C-C bond in graphene, indicating loss of commensuration.  
173

174

175

176 **Supplementary Note 12. Zigzag PbI<sub>2</sub> edge alignment with Graphene after edge etching**

177 When the edges of PbI<sub>2</sub> are etched to form sharp zig-zag faceted terminations after electron  
178 beam irradiation, it maintains alignment with graphene, i.e. the etching takes place in zigzag-  
179 PbI<sub>2</sub> and armchair graphene direction. Supplementary figure 12(a) shows the low  
180 magnification image of PbI<sub>2</sub> flake on top of graphene at t=0s. Supplementary figure 12(b-c)  
181 show the red and blue boxed regions of supplementary figure 12(a) respectively. From these  
182 figures, we can see that initially the zigzag PbI<sub>2</sub> was aligned in the armchair graphene  
183 direction. Supplementary figure 12(d-e) show the time lapse series of ADF-STEM images  
184 recorded after 30 seconds of electron beam exposure. The yellow lines marked in  
185 supplementary figure 12(e) show the edge etching directions. Supplementary figure 12(f) is  
186 the atomic model of the PbI<sub>2</sub>/graphene with same lattice orientation as of supplementary  
187 figure 12(a). As it can be seen, the FFT of the atomic model is shown in the inset of  
188 supplementary figure 12(f) as the PbI<sub>2</sub>/graphene nanodisk imaged at t=0s in supplementary  
189 figure 12(a). Comparing that with the atomic model of PbI<sub>2</sub>/graphene in supplementary figure  
190 12(f), we can see that the termination of the edges in supplementary figure 12(d-e) still  
191 conform to the same directionality, i.e. zigzag PbI<sub>2</sub>-armchair graphene.

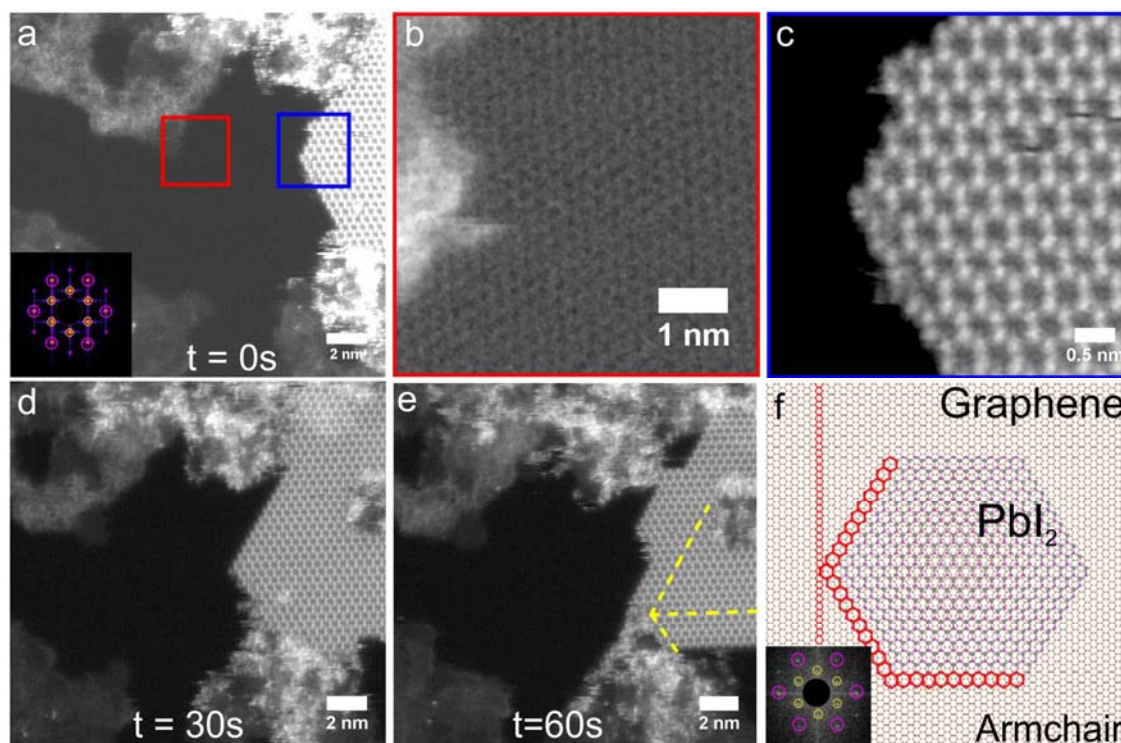

192

193 **Supplementary Figure 12.** (a) ADF-STEM image of  $\text{PbI}_2$  flake on top of graphene at  $t=0\text{s}$ .  
 194 (b) Higher magnification of the region indicated by the red box in (a) showing the graphene  
 195 resolution. (c) Higher magnification of the region indicated by the blue box in (a) showing  
 196 the  $\text{PbI}_2$  orientation. (d-e) Time lapse ADF-STEM image of the edge at  $t = 0$  seconds and  $t =$   
 197  $30$  seconds of electron beam exposure. The yellow arrow indicates the ejection of the atoms  
 198 from the edges due to the damage from the electron beam, leading to ‘un-zipping’ of the  
 199 chain, maintaining the zig-zag edge of the flakes. (f) Atomic model of the  $\text{PbI}_2$ /graphene with  
 200 same lattice orientation as of supplementary figure (a). The Inset shows the FFT of the atomic  
 201 model.

202 **Supplementary Note 13. Relative alignment of time frame of PbI<sub>2</sub> etching**

203 Following supplementary figure 13 shows the time lapse ADF-STEM image for the relative  
204 alignment frames for the region of PbI<sub>2</sub> shown in main text figure 4(j-l). Supplementary  
205 figure13(a-c) shows the relative alignment of the picture frame based on the presence of the  
206 stable defect shown in red and blue boxes (higher resolution images shown in the  
207 supplementary figure 13(d-f) and also on the accumulated atomic clusters shown by the  
208 orange and yellow arrowheads. The following figures show the relative alignment of the time  
209 frames of the captured images shown in figure 4(j-l) of the main text.

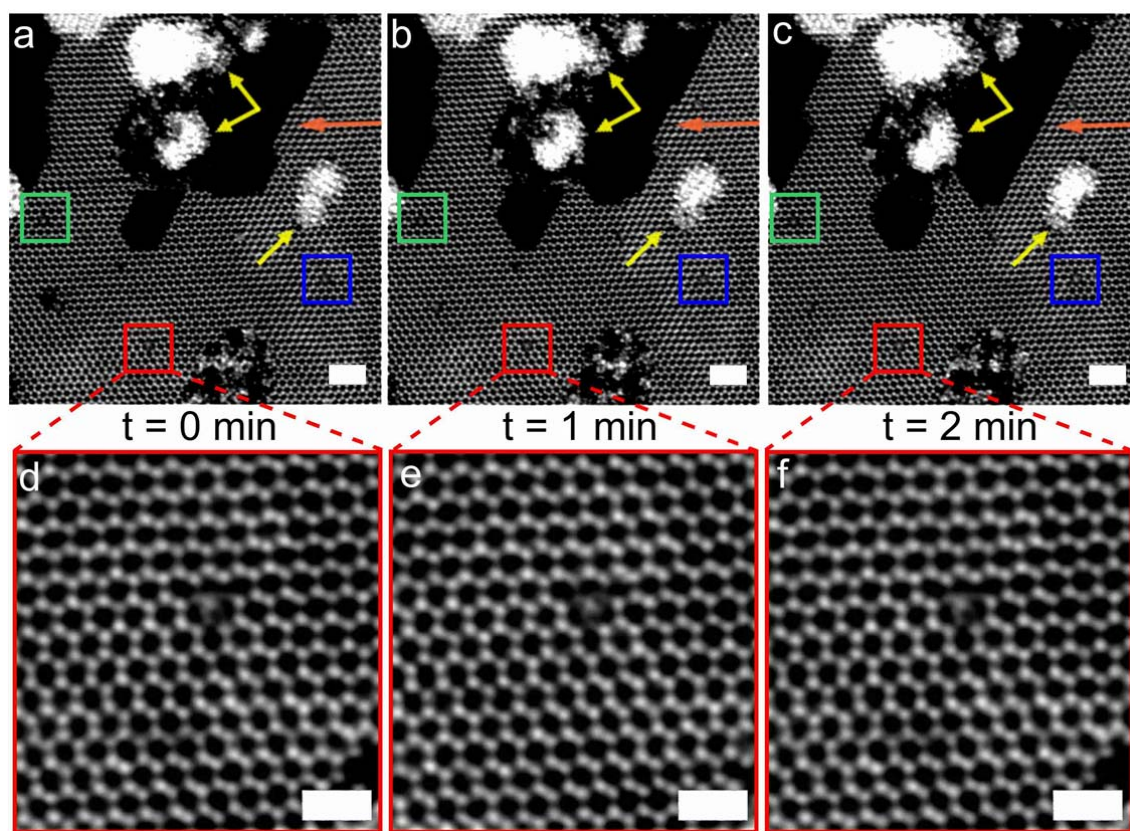

210

211 **Supplementary Figure 13.** (a-c) ADF-STEM time lapse image of a section of PbI<sub>2</sub> taken  
212 after every 1 minute of electron beam irradiation. The red and blue boxes show the stable  
213 defect and yellow and orange arrowhead are used to point the accumulated atomic clusters  
214 which have been used for relative alignment of the frames. (d-f) Higher resolution images of  
215 the stable defect boxed in red in panels (a-c) respectively.

216



217 **Supplementary Note 14. Process of determining some defects**

218 The interpretation and assignment of the experimental images to their simulated  
219 configurations, in figure 5 of the main text, were made on the line profile of the defects after  
220 normalizing their intensities. As it can be seen, the line profiles of the corresponding images,  
221 in the following supplementary figures 14(a-d), show clear Lead and Iodide vacancies in blue  
222 and red respectively. The supplementary figure 14(d) shows the line profile shows 2I + 2I  
223 vacancy, but also, we can deduce that there is also 1Pb vacancy, as we are unable to see the  
224 nearest neighbor contrast from the Pb atom which is prominent in the supplementary figure  
225 14(c).

226

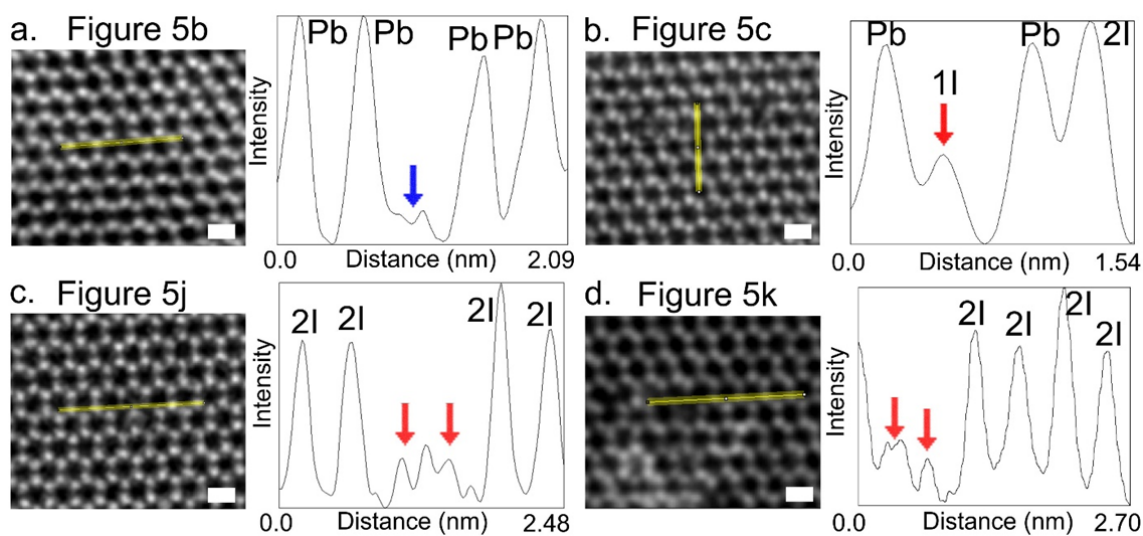

227

228 **Supplementary Figure 14.** ADF-STEM image of lead iodide defects. The blue and red  
229 arrows correspond to lead and iodide vacancies respectively. (a) 1 Lead vacancy, as can be  
230 seen from corresponding line profile. (b) 1 Iodide vacancy, as can be seen from the  
231 corresponding line profile. (c) 2I + 2I vacancies, as can be seen from the corresponding line  
232 profile. (d) The line profile shows 2I + 2I + 1Pb vacancy, as seen in the corresponding line  
233 profile. All scale bars correspond to 0.5 nm.

234

235 **Supplementary Note 15. Sputtering energy**

236 A  $10 \times 10 \times 1$  supercell is used for calculating the sputtering energy. The sputtering energy is  
237 defined by the energy difference between the crystalline structure and the one with a vacancy,  
238 for instance, the I sputtering energy is  $\Delta E_I = E_{crystal} - (E_{V_I} + E_I)$ . The energy tolerance is  
239 set to 0.0001 for all energy calculations. The following supplementary figure 15 shows (a)  
240 Pristine supercell, (b) supercell with one I vacancy, and (c) supercell with one Pb vacancy.  
241 The energy differences, as calculated are 3.15 eV and 6.36 eV for Iodide and Lead, as shown  
242 in the equations (1) and (2) respectively.

243 
$$\Delta E_I = E_{crystal} - (E_{V_I} + E_I) = (-837.01) - (-840.16) = 3.15 \text{ eV} \quad (1)$$

244 
$$\Delta E_{Pb} = E_{crystal} - (E_{V_{Pb}} + E_{Pb}) = (-833.80) - (-840.16) = 6.36 \text{ eV} \quad (2)$$

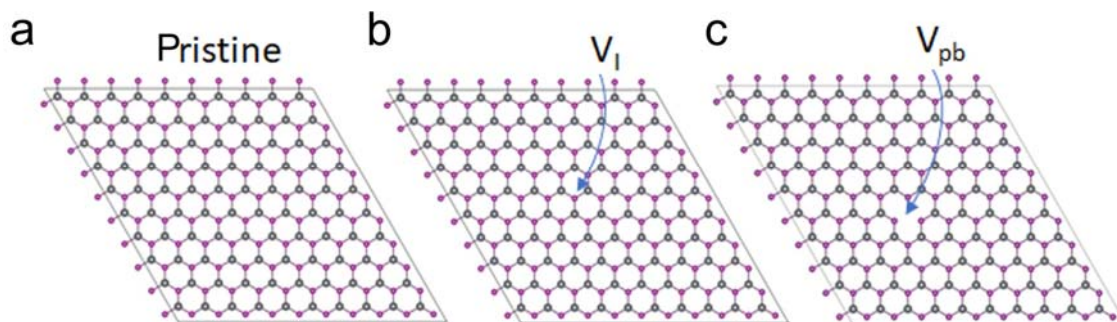

245

246 **Supplementary Figure 15.** Atomic model of the  $\text{PbI}_2$  (a) pristine supercell (b) one I vacancy  
247 supercell (c) one Pb vacancy.

248

249 **Supplementary Note 16. Accumulation of lead particles after etching**

250 The following supplementary figure 16 shows the effect of the accumulation of the atoms  
251 after electron beam exposure. Iodine atoms are very light and hence, the likelihood of them  
252 getting displaced from the lattice is higher. The contrast of the single atoms imaged are of  
253 similar magnitude to that of Lead within the  $\text{PbI}_2$  lattice. The atoms aggregate to form  
254 amorphous clusters, as shown with red arrows in supplementary figure 16(a) or get dispersed  
255 on the surface of graphene as shown in supplementary figure 16(b).

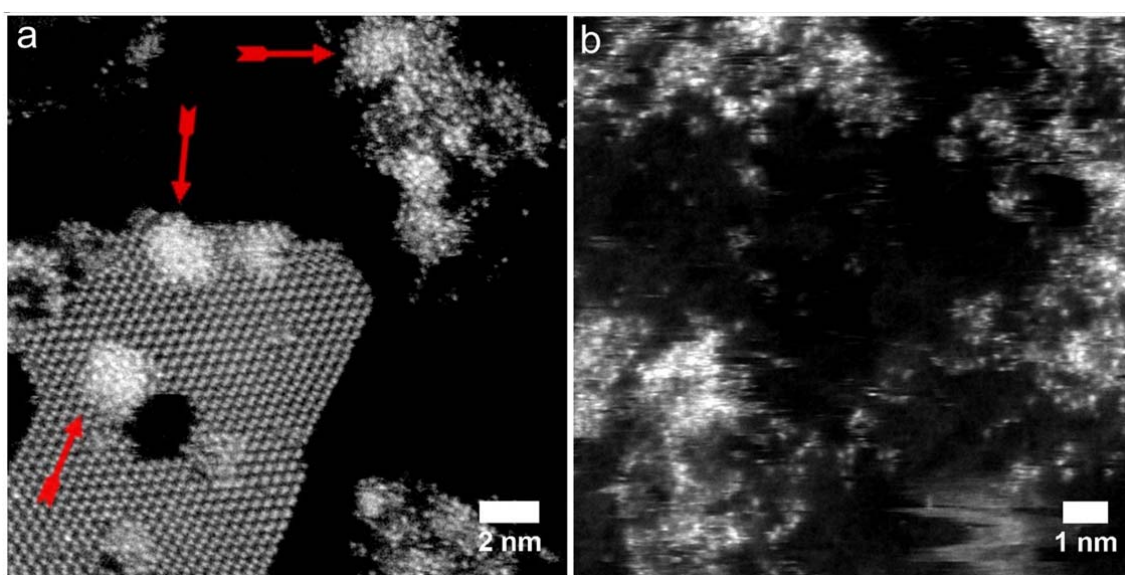

256

257 **Supplementary Figure 16.** (a) ADF-STEM image of lead atoms forming clusters (b) ADF-  
258 STEM image of lead forming dispersion on the graphene.

259



260 **Supplementary Note 17. Vacancy migration**

261 10×10 supercells and 4×4 k-point grids are employed, and a criterion of 0.03 eV/Å is set for  
262 the force convergence. For  $V_I$  migration, two pathways are considered: in plane and out-of-  
263 plane directions, and only in-plane  $V_{Pb}$  migration is considered. The starting and end points  
264 for NEB search are prepared by removing the corresponding atoms from the relaxed pristine  
265 structure, and then further relaxed. The 6 intermediate images are interpolated by the Vasp  
266 TST toolkit. The converged energy paths are the fitted by cubic spline functions.

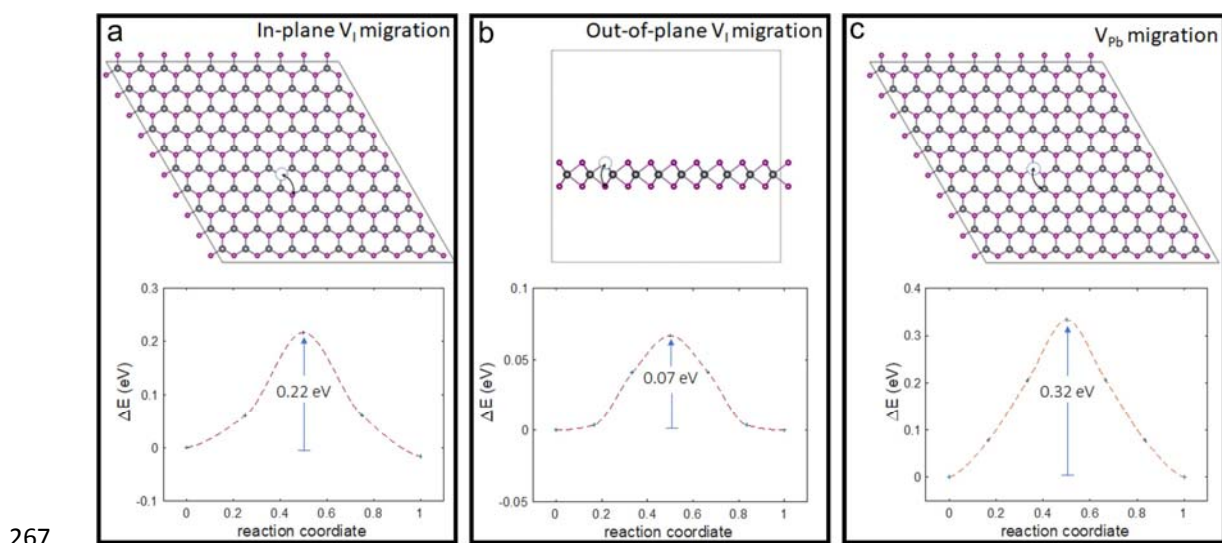

268 **Supplementary Figure 17.** Atomic structure and energy profile for vacancy migration of (a)  
269 Iodide atom in-plane (b) Iodide atom out-of-plane and (c) Lead atom.

270
